# Supplementary material for: Responses of rat and mouse primary microglia to pro- and anti-inflammatory stimuli: molecular profiles, K+ channels and migration
Source: Springer Nature journal article supplement (doi:10.1186/s12974-017-0941-3), 2017-08-22
Supplement: MOESM3 [file 14233218]

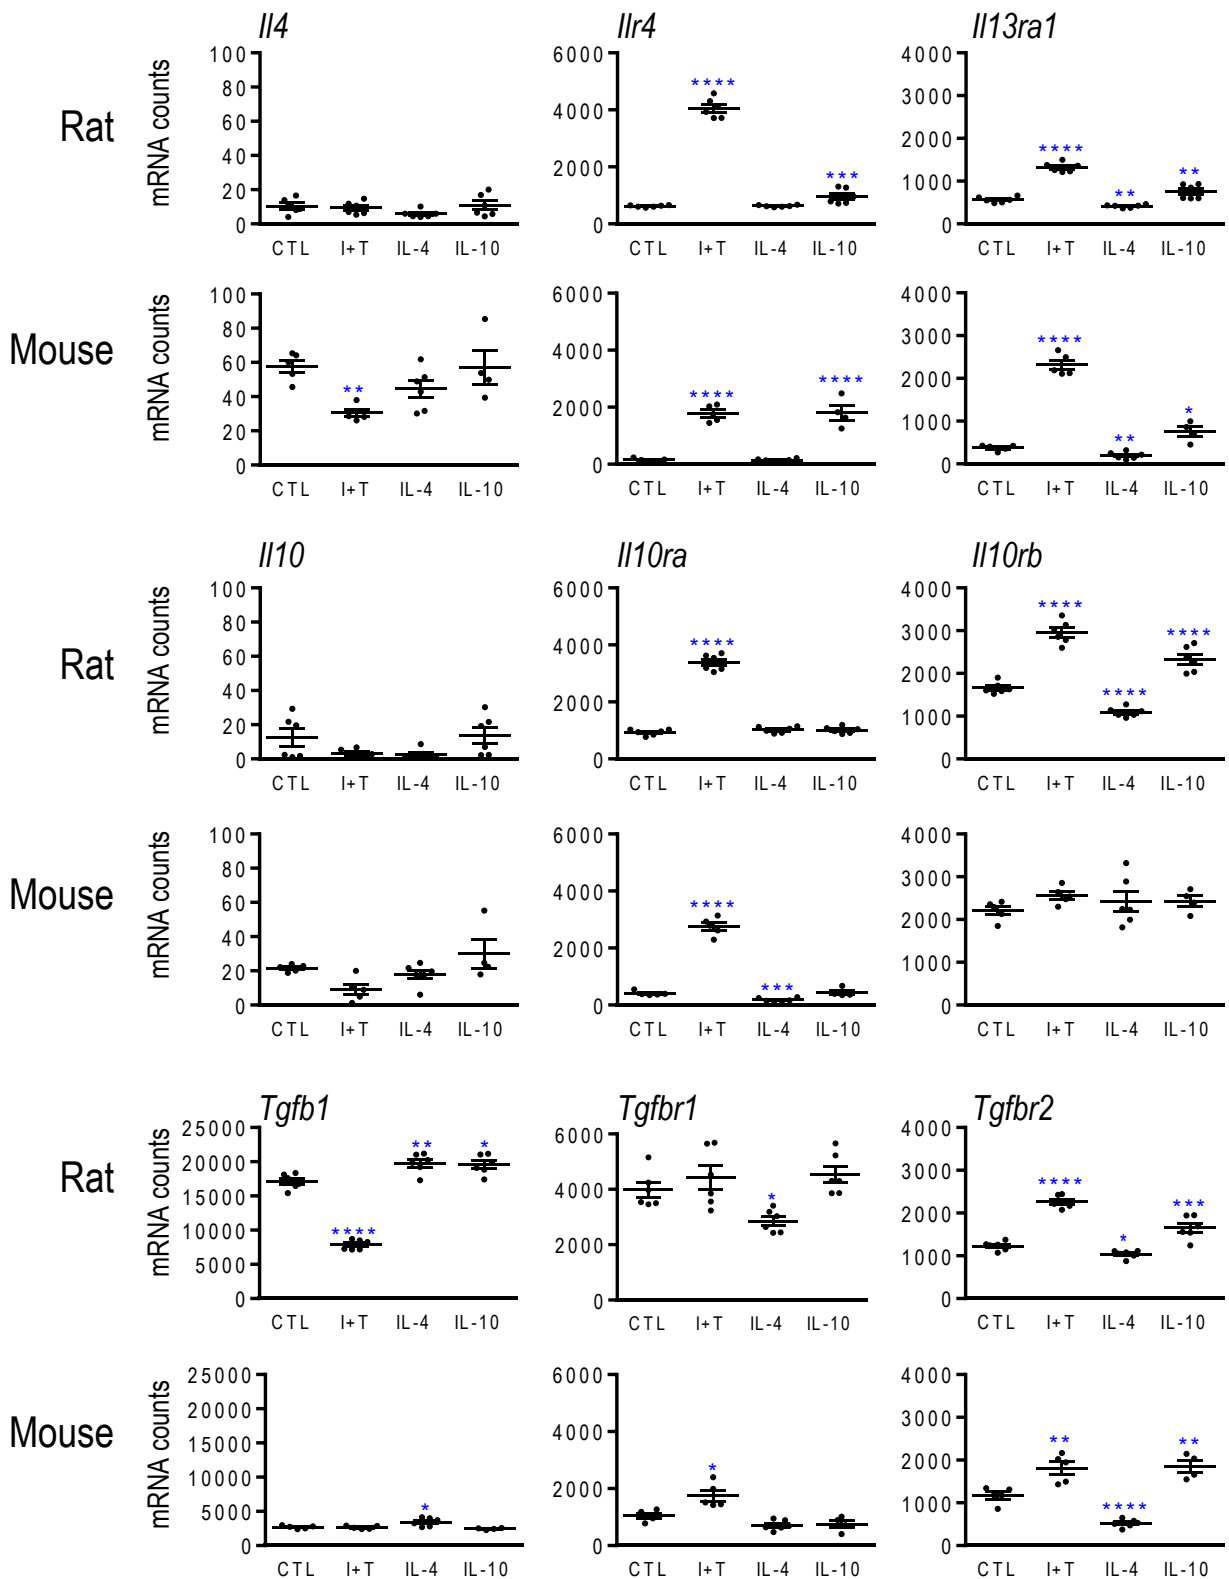

**Additional File 3. Transcript expression of anti-inflammatory cytokines and their receptors.** Rat and mouse microglia were unstimulated (CTL) or stimulated with IFN- $\gamma$  and TNF- $\alpha$  (I+T), IL-4 or IL-10 for 24 h. mRNA counts for each gene were normalized to two housekeeping genes (described in Methods) and are shown as mean  $\pm$  SEM ( $n=4-6$  individual cultures). \* $p < 0.05$ ; \*\* $p < 0.01$ ; \*\*\* $p < 0.001$ ; \*\*\*\* $p < 0.0001$
