# Supplementary material for: Responses of rat and mouse primary microglia to pro- and anti-inflammatory stimuli: molecular profiles, K+ channels and migration
Source: Springer Nature journal article supplement (doi:10.1186/s12974-017-0941-3), 2017-08-22
Supplement: MOESM4 [file 14233218]

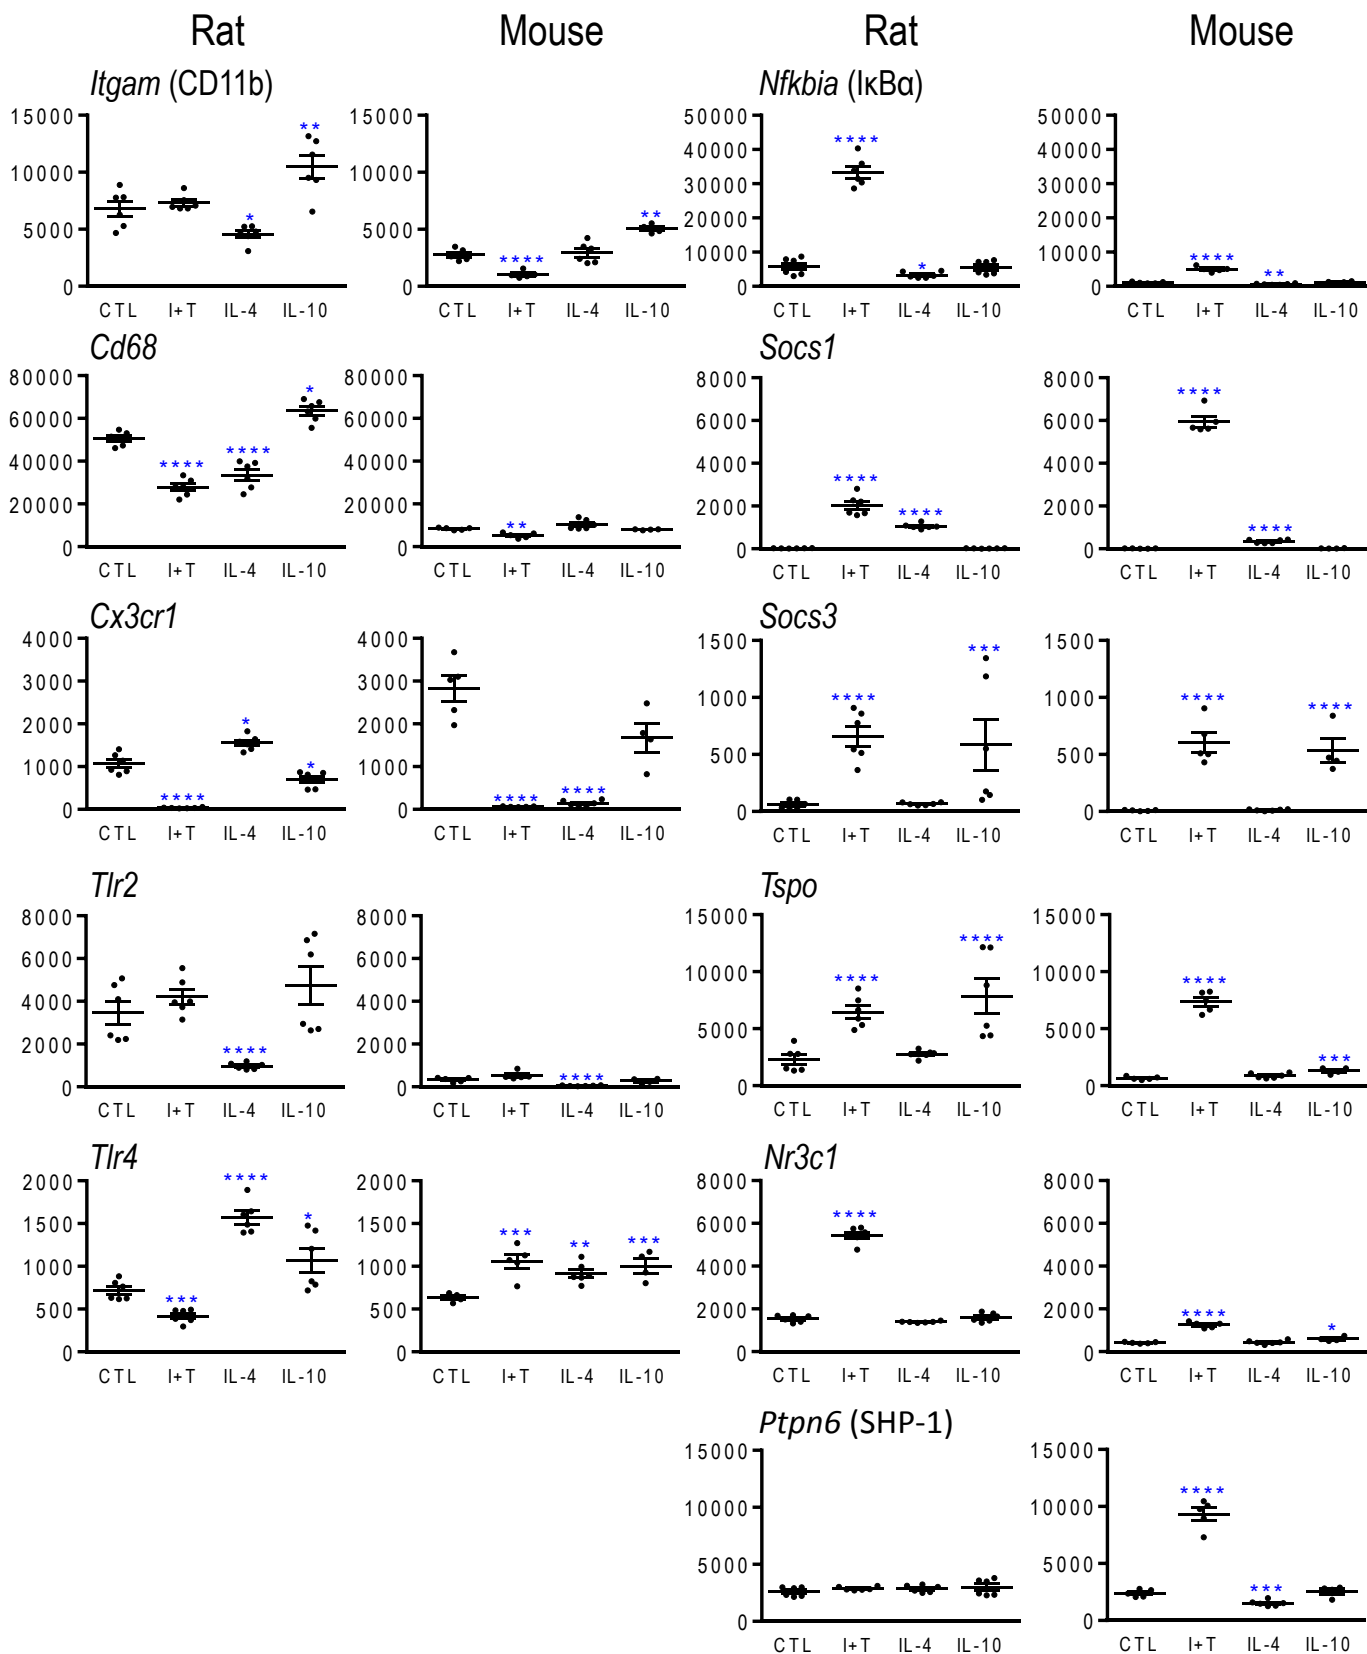

**Additional File 4. Transcript expression of microglia markers and immune modulators.** Rat and mouse microglia were unstimulated (CTL) or stimulated with IFN- $\gamma$  and TNF- $\alpha$  (I+T), IL-4 or IL-10 for 24 h. mRNA counts for each gene were normalized to two housekeeping genes (described in Methods) and are shown as mean  $\pm$  SEM ( $n=4-6$  individual cultures). \* $p$ <0.05; \*\* $p$ <0.01; \*\*\* $p$ <0.001; \*\*\*\* $p$ <0.0001
